# Supplementary material for: Artificial intelligence accelerates the identification of nature-derived potent LOXL2 inhibitors
Source: Springer Nature journal article supplement (doi:10.1038/s41598-025-95530-9), 2025-03-27
Supplement: MOESM1 [file 41598_2025_95530_MOESM1_ESM.pdf]

Figure S1

Repeat 1 and 2

LOXL2 99 kd

(From right to left)

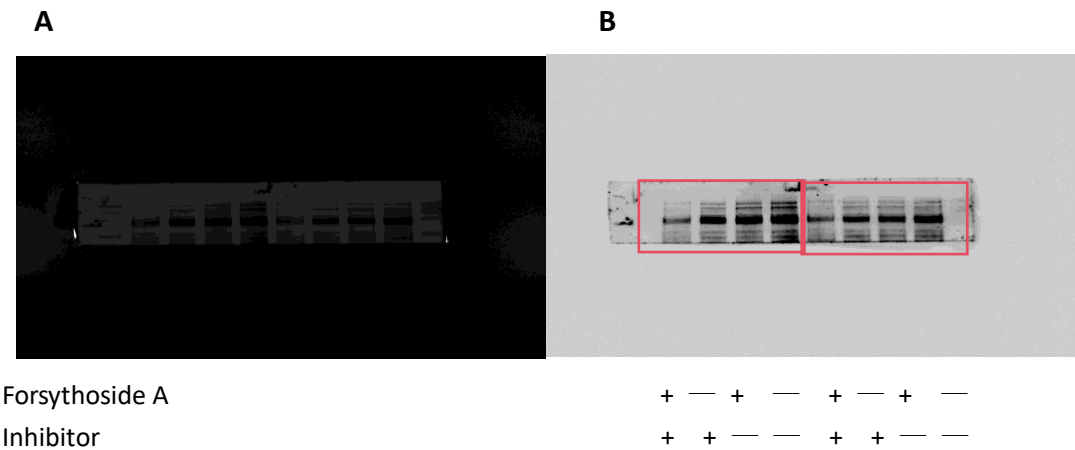

$\beta$ -actin 42 kd

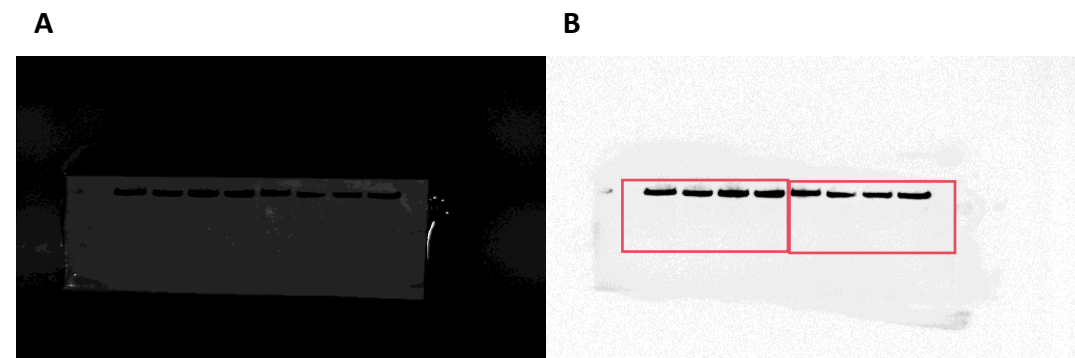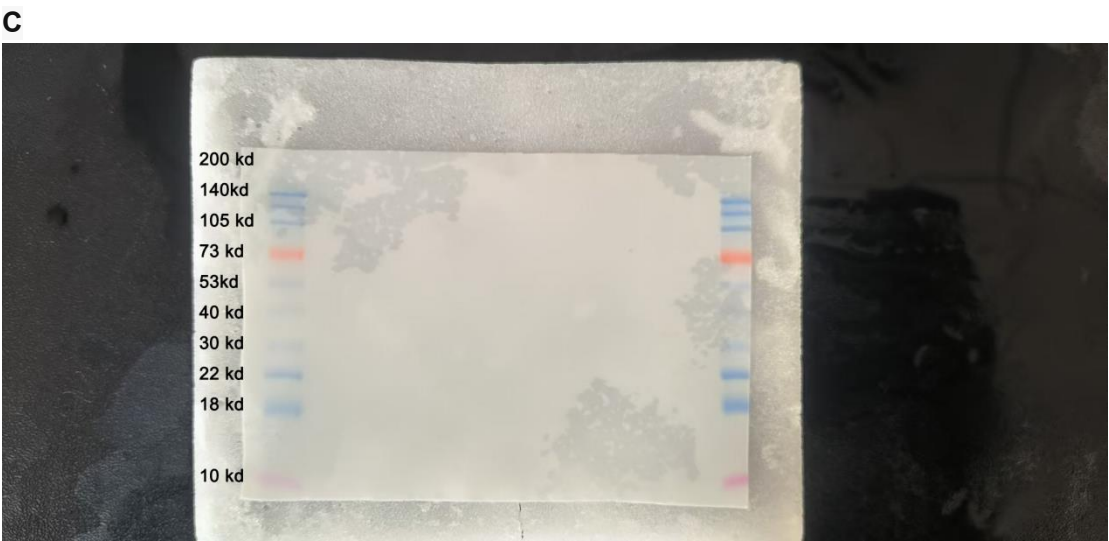

D

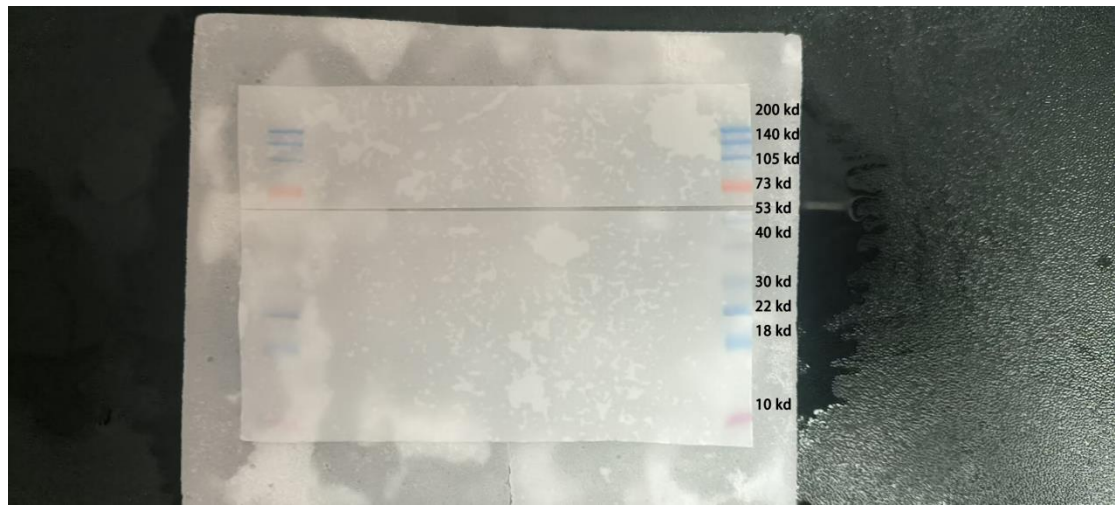

E

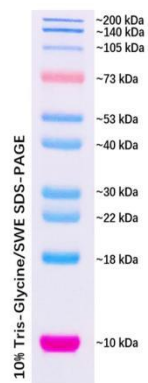

Repeat 3

LOXL2 99 kd

A

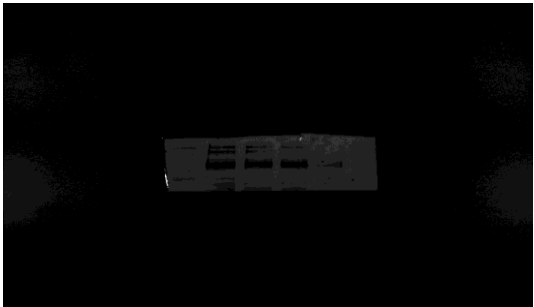

B

(From left to right)

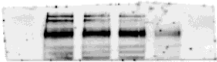

Forsythoside A

Inhibitor

$\beta$ -actin 42 kd

— + — +  
— — + +

A

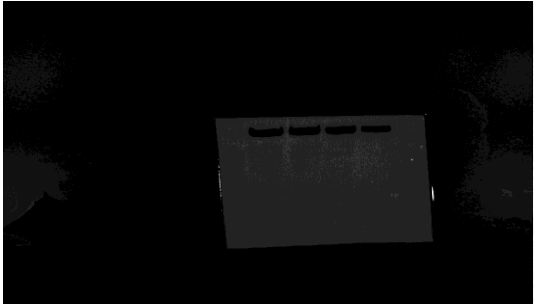

B

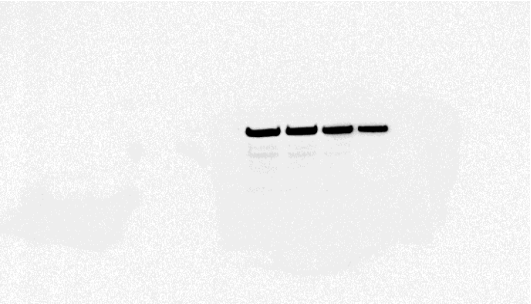

C

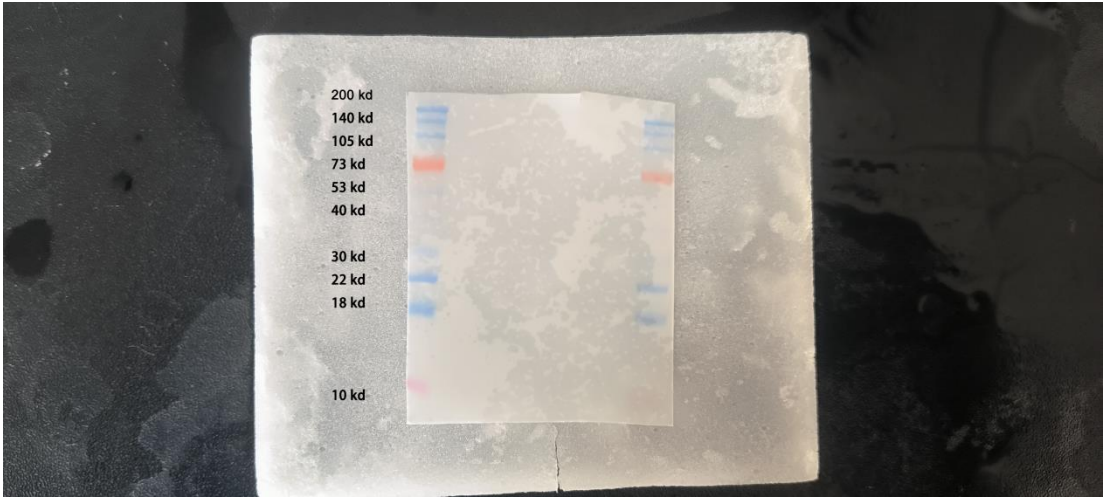

**D**

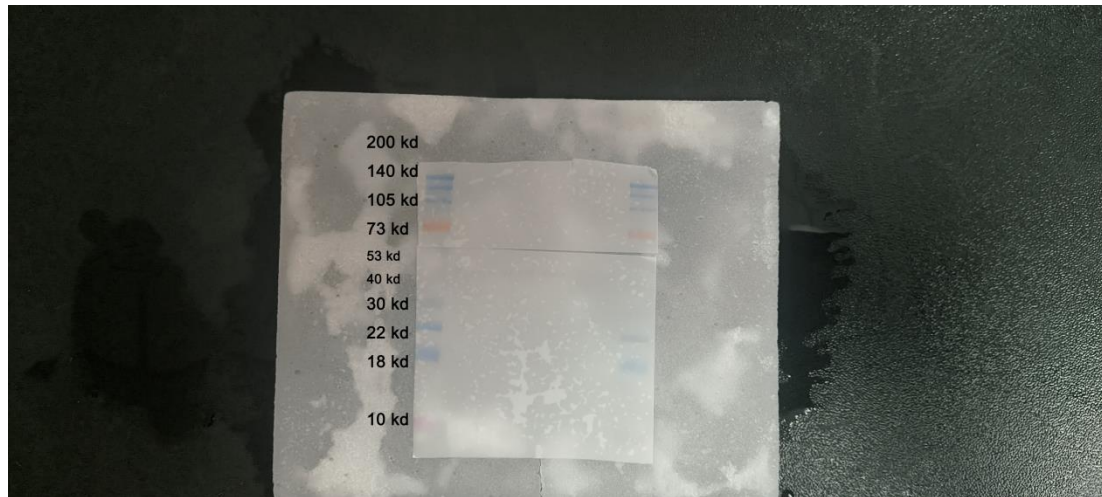

**Complete three-time Western blot image in Fig. 10.** A is the strip map with maker, B is the sample map, C is the original whole film and D is the whole film after cropping and piecing together and E is the maker used.
